# Supplementary material
Source: Springer Nature journal article supplement (https://www.springermedizin.de/resource/supplementary/12885_2009_1928_MOESM3_ESM.pdf/9460114)
Supplement: MOESM3 [file 9460114]

A

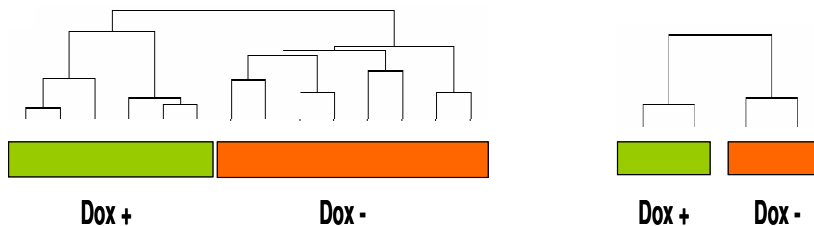

B

| Gene set name                                                                        | Database   | P-value               |                        |                       |                        | Overlap               |                        |                       |                        | Gene set length |
|--------------------------------------------------------------------------------------|------------|-----------------------|------------------------|-----------------------|------------------------|-----------------------|------------------------|-----------------------|------------------------|-----------------|
|                                                                                      |            | In-vivo - Dox+ > Dox- | In-vitro - Dox+ > Dox- | In-vivo - Dox+ < Dox- | In-vitro - Dox+ < Dox- | In-vivo - Dox+ > Dox- | In-vitro - Dox+ > Dox- | In-vivo - Dox+ < Dox- | In-vitro - Dox+ < Dox- |                 |
| Interferon signaling                                                                 | Ingenuity  | ■                     |                        |                       |                        | 12                    | 1                      | 0                     | 1                      | 27              |
| IFN alpha/beta signaling pathway                                                     | GeneGo     | ■                     |                        |                       |                        | 8                     | 1                      | 0                     | 0                      | 28              |
| Antiviral actions of interferons                                                     | GeneGo     | ■                     |                        |                       |                        | 5                     | 1                      | 0                     | 0                      | 13              |
| Antigen presentation by MHC class I                                                  | GeneGo     | ■                     |                        |                       |                        | 7                     | 0                      | 0                     | 1                      | 58              |
| Toll-like receptor signaling pathway                                                 | Kegg       | ■                     |                        |                       |                        | 6                     | 1                      | 0                     | 0                      | 83              |
| Protein ubiquitination pathway                                                       | Ingenuity  | ■                     |                        |                       |                        | 8                     | 2                      | 0                     | 3                      | 166             |
| Putative SUMO-1 pathway                                                              | GeneGo     | ■                     |                        |                       |                        | 3                     | 0                      | 0                     | 0                      | 27              |
| Prolactin receptor signaling                                                         | GeneGo     | ■                     |                        |                       |                        | 4                     | 0                      | 0                     | 0                      | 58              |
| Role of TLRs 3 and 4 in cell antiviral response: TICAM1-specific signalling pathways | GeneGo     | ■                     |                        |                       |                        | 3                     | 1                      | 0                     | 0                      | 29              |
| PDGF signaling via STATs and NF-kB                                                   | GeneGo     | ■                     |                        |                       |                        | 3                     | 0                      | 0                     | 0                      | 40              |
| IL1 signaling pathway                                                                | GeneGo     | ■                     |                        |                       |                        | 3                     | 0                      | 2                     | 1                      | 40              |
| Angiotensin signaling via STATs                                                      | GeneGo     | ■                     | ■                      |                       |                        | 3                     | 3                      | 1                     | 1                      | 51              |
| Negative regulation of apoptosis                                                     | GO Process |                       | ■                      | ■                     |                        | 8                     | 3                      | 16                    | 8                      | 528             |
| Growth                                                                               | GO Process |                       | ■                      | ■                     |                        | 5                     | 7                      | 17                    | 8                      | 527             |
| p38 MAPK Signaling                                                                   | Ingenuity  |                       | ■                      |                       |                        | 1                     | 1                      | 4                     | 0                      | 83              |

■  $p < 0.0001$   
 ■  $p < 0.005$   
 ■  $p < 0.05$
